# Supplementary material for: Effects of Human Immunodeficiency Virus Status on Symptom Severity in Influenza-Like Illness in An Otherwise Healthy Adult Outpatient Cohort
Source: HighWire-hosted journal article supplement (doi:10.1136/jim-2020-001694), 2021-04-23
Supplement: jim-2020-001694supp001_data_supplement.pdf [file jim-2020-001694supp001_data_supplement.pdf]

Supplemental Table 1. Linear regression model for composite symptom scores accounting for HIV status, age, influenza season, race, and military status. Numbers shown are betas (standard errors) from multivariate models.

|               | LRI score                  | URI score                  | Systemic score             | GI score                    | Total score                 |
|---------------|----------------------------|----------------------------|----------------------------|-----------------------------|-----------------------------|
| (Intercept)   | 5.72 (0.49) <sup>***</sup> | 6.02 (0.48) <sup>***</sup> | 7.72 (0.45) <sup>***</sup> | 5.00 (0.60) <sup>***</sup>  | 24.46 (1.44) <sup>***</sup> |
| HIV+          | -0.39 (0.44)               | -0.49 (0.44)               | 0.02 (0.41)                | 1.10 (0.55) <sup>*</sup>    | 0.23 (1.31)                 |
| 18-24y        | -                          | -                          | -                          | -                           | -                           |
| 25-34y        | -0.35 (0.32)               | -0.04 (0.32)               | 0.24 (0.29)                | -1.05 (0.40) <sup>**</sup>  | -1.21 (0.95)                |
| 35-44y        | -0.02 (0.39)               | 0.42 (0.39)                | 0.36 (0.36)                | -1.84 (0.49) <sup>***</sup> | -1.08 (1.17)                |
| 45y+          | 0.23 (0.65)                | 0.40 (0.64)                | 0.66 (0.60)                | -1.97 (0.81) <sup>*</sup>   | -0.69 (1.94)                |
| 2010/11       | -                          | -                          | -                          | -                           | -                           |
| 2011/12       | -0.27 (0.32)               | 0.30 (0.32)                | 0.26 (0.30)                | 0.56 (0.40)                 | 0.85 (0.96)                 |
| 2012/13       | -0.07 (0.41)               | -0.09 (0.40)               | 0.45 (0.38)                | 0.34 (0.51)                 | 0.63 (1.21)                 |
| 2013/14       | 0.17 (0.37)                | -0.20 (0.36)               | 0.67 (0.34) <sup>*</sup>   | 1.11 (0.46) <sup>*</sup>    | 1.74 (1.10)                 |
| 2014/15       | 0.55 (0.54)                | 0.47 (0.54)                | 0.50 (0.50)                | 0.55 (0.68)                 | 2.07 (1.61)                 |
| Black         | -                          | -                          | -                          | -                           | -                           |
| White         | 0.19 (0.41)                | -0.03 (0.40)               | -0.05 (0.37)               | 0.25 (0.51)                 | 0.36 (1.21)                 |
| Hispanic      | 0.37 (0.45)                | 0.50 (0.45)                | 0.49 (0.42)                | 0.35 (0.56)                 | 1.71 (1.35)                 |
| Unknown/Other | -0.12 (0.51)               | 0.42 (0.50)                | -0.02 (0.47)               | -0.25 (0.63)                | 0.03 (1.51)                 |
| Active duty   | -                          | -                          | -                          | -                           | -                           |
| Retired       | -0.20 (0.75)               | -0.33 (0.74)               | -0.15 (0.69)               | -0.70 (0.93)                | -1.38 (2.23)                |
| Dependent     | -0.21 (0.74)               | 0.38 (0.73)                | -0.30 (0.68)               | -0.06 (0.91)                | -0.19 (2.18)                |

<sup>\*\*\*</sup> p < 0.001, <sup>\*\*</sup> p < 0.01, <sup>\*</sup> p < 0.05
